# Supplementary material for: High-fidelity imaging of intracellular microRNA via a bioorthogonal nanoprobe
Source: Royal Society of Chemistry journal article supplement (doi:10.1039/d3an00088e), 2023-01-01
Supplement: d3an00088e1.pdf [file d3an00088e1.pdf]

## Supporting Information

# High-Fidelity Imaging of Intracellular MicroRNA via a Bioorthogonal Nanoprobe

*Hengyi Chen*<sup>a#</sup>, *Xiaohui Chen*<sup>a, b#</sup>, *Yi Chen*<sup>a#</sup>, *Chong Zhang*<sup>b</sup>, *Zixin Sun*<sup>a</sup>, *Jiayi Mo*<sup>e</sup>, *Yongzhong Wang*<sup>b</sup>, *Jichun Yang*<sup>a\*</sup>, *Dongsheng Zou*<sup>f\*</sup>, *Yang Luo*<sup>a, c, d\*</sup>

<sup>a</sup>Center of Smart Laboratory and Molecular Medicine, School of Medicine, Chongqing University, Chongqing, 400044, P.R. China.

<sup>b</sup>Key Laboratory for Biorheological Science and Technology of Ministry of Education, College of Bioengineering, Chongqing University, Chongqing, 400044, P.R. China.

<sup>c</sup>College of Life Science and Laboratory Medicine, Kunming Medical University, Kunming, Yunnan, 650050, P.R. China.

<sup>d</sup>Department of Laboratory Medicine, Third Affiliated Hospital of Kunming Medical University (Tumor Hospital of Yunnan Province), Kunming, Yunnan, 650118, P.R. China.

<sup>e</sup>School of Clinical Medicine, Southwest Medical University, Luzhou, Sichuan, 646000, P.R. China.

<sup>f</sup>College of Computer Science, Chongqing University Chongqing, 400044, China

#These authors contributed equally to this work.

\*Send correspondence to: [luoyang@kmmu.edu.cn](mailto:luoyang@kmmu.edu.cn), [dszou@cqu.edu.cn](mailto:dszou@cqu.edu.cn), [yangjichun@cqu.edu.cn](mailto:yangjichun@cqu.edu.cn)

## **Table of Contents**

**Table S1** DNA oligonucleotides sequences used in this study

**Table S2** Mathematical formula for the cascade amplification of the FTO-switched nanoprobe

**Table S3** Comparison of various strategies for living cell imaging.

**Table S4** The detailed clinical information of clinical samples

**Figure S1** The lowest free energy structures of Probe A and Probe A/Probe B Complex

**Figure S2** The lowest free energy structures of Probe C

**Figure S3** XPS spectra of Mn 2p of MnO<sub>2</sub> nanosheets

**Figure S4** Probe B optimization experiment

**Figure S5** Optimization of the reaction time

**Figure S6** Optimization of the reaction temperature

**Figure S7** Time-dependent intracellular imaging by this proposed method

**Figure S8** Cell proliferation assay for the investigation of cytotoxicity of MnO<sub>2</sub> nanosheets

**Figure S9** Comparison of the flow cytometric mean fluorescence intensity data in MCF-7 and MCF-10A cells using the FTO-switched nanoprobe and the non-FTO-switched nanoprobe.

**Figure S10** The flow cytometric mean fluorescence intensity data in MCF-7, Hela and MCF-10A cells using the FTO-switched nanoprobe

**Figure S11** Application of the FTO-switched nanoprobe in the clinic

## Supporting tables

**Table S1.** DNA oligonucleotides sequences used in this study

| Probe name                               | Sequence(5'-3')                                                                  |
|------------------------------------------|----------------------------------------------------------------------------------|
| non-FTO-switched probe A                 | TCATCTCTTCTCCGAGCCGGTCGAAATAGTAGCTTATC<br>AGACTGATG                              |
| Probe A                                  | TCATCTCTTCTCCG/6-<br>MedA/GCCGGTCGAAATAGTAGCTTATCAGACTGATG                       |
| Probe C                                  | FAM-<br>TCAACATCAGTCATAAAGCTACTAT/rA/GGAAGAGATG<br>ACTAGCTTATCAGACTGATGTTGA-BHQ1 |
| Cleaved Probe C                          | GGAAGAGATGACTAGCTTATCAGACTGATGTTGA                                               |
| Probe B-1                                | TCAACATCAGTCTGATAAGCTACTATTT                                                     |
| Probe B-2                                | TCAACATCAGTCTGATAAGCTACTATT                                                      |
| Probe B-3                                | TCAACATCAGTCTGATAAGCTACTAT                                                       |
| Probe B-4                                | TCAACATCAGTCTGATAAGCTACTA                                                        |
| Probe B-5                                | TCAACATCAGTCTGATAAGCTACT                                                         |
| Probe B-6                                | TCAACATCAGTCTGATAAGCTAC                                                          |
| Forward primer of miRNA-21               | GCCGCTAGCTTATCAGACTGATGT                                                         |
| Reverse primer of miRNA-21               | GTGCAGGGTCCGAGGT                                                                 |
| Reverse transcription primer of miRNA-21 | GTCGTATCCAGTGCAGGGTCCGAGGTATTTCGCACTGGA<br>TACGACTCAACA                          |
| Forward primer of U6                     | CTCGCTTCGGCAGCACA                                                                |
| Reverse primer of U6                     | AACGCTTCACGAATTTGCGT                                                             |
| miRNA-21                                 | UAGCUUAUCAGACUGAUGUUGA                                                           |
| miRNA-155                                | UUA AUGCUAAUCGUGAUAGGGGU                                                         |
| Let-7a                                   | UGAGGUAGUAGGUUGUAUAGUU                                                           |
| miRNA-122                                | UGGAGUGUGACAAUGGUGUUUG                                                           |
| miRNA-31                                 | AGGCAAGAUGCUGGCAUAGCU                                                            |
| miRNA-27a                                | UUCACAGUGGCUAAGUCCGC                                                             |
| SS-FAM                                   | FAM-ATACGG GCTGAG GCGATG GCATTT                                                  |

**Table S2.** The mathematical formula for the cascade amplification of the FTO-switched nanoprobe.

In the presence of sufficient FTO enzymes in the cell, if only X microRNA is added to the nanosystem, then theoretically X active DNAzyme can be generated through displacement reaction, and X active DNAzyme is believed to be able to cut px hairpin substrates. Meanwhile,  $Mn^{2+}$  can be considered to have a q-fold enhancement effect compared with  $Mg^{2+}$ . The theoretical amplification efficiency is calculated as follows:

| Recycle No. | Number of Target | Outcome signal    | Total number of output Fluorescence signals |
|-------------|------------------|-------------------|---------------------------------------------|
| 0           | x                | 0                 | 0                                           |
| 1           | x                | pqx               | pqx                                         |
| 2           | $x(pq+1)$        | $pqx(pq+1)$       | $pqx+pqx(pq+1)$                             |
| ...         | ...              | ...               | ...                                         |
| n           | $x(pq+1)^{n-1}$  | $pqx(pq+1)^{n-1}$ | $x(pq+1)[(pq+1)^{n-1}-1]$                   |

Finally, when the recycle No. is n, the total number of output fluorescence signals is  $x(pq+1)[(pq+1)^{n-1}-1]$ , which indicates that the DNA circuit is in an exponential amplification mode.

**Table S3.** Comparison of various strategies for living cell imaging.

| Strategies                         | Signal amplification method           | Controllability | LOD     | Refs |
|------------------------------------|---------------------------------------|-----------------|---------|------|
| The proposed method                | DNAzyme                               | GSH-FTO         | 9.7 pM  | -    |
| NIR controllable DNA walker        | DNA walker                            | NIR             | 100 pM  | 1    |
| Smart Hairpins@ $MnO_2$ Nanosystem | Enzyme-free exponential amplification | GSH             | 33 fM   | 2    |
| DNAzyme HIFU probe                 | DNAzyme                               | HIFU            | 345 nM  | 3    |
| Self-protected DNAzyme walker      | Promoted DNAzyme                      | None            | 10 pM   | 4    |
| DNAzyme-recycling amplification    | DNAzyme                               | GSH             | 100pM   | 5    |
| DNA Cross-Linked Polymeric         | Hybridization chain reaction          | None            | 4.4 pM  | 6    |
| Self-Powered FRET Flares           | Catalytic hairpin assembly            | AS1411          | 25 pM   | 7    |
| Autonomous DNA Nanomachine         | DNA walker                            | pH and NIR      | 19.4 pM | 8    |

**Table S4.** The detail clinical information of clinical samples, including breast cancer patients (BC) patients and healthy donors (HD) .

| Sample | Age | Gender | Tumor staging | HER2 status (immunohistochemistry) |
|--------|-----|--------|---------------|------------------------------------|
| HD1    | 28  | Female | -             | -                                  |
| HD2    | 34  | Female | -             | -                                  |
| HD3    | 57  | Female | -             | -                                  |
| HD4    | 38  | Female | -             | -                                  |
| HD5    | 60  | Female | -             | -                                  |
| BC1    | 55  | Female | II            | +++                                |
| BC2    | 45  | Female | III           | +++                                |
| BC3    | 67  | Female | I             | ++                                 |
| BC4    | 39  | Female | II            | ++                                 |
| BC5    | 68  | Female | IV            | +++                                |

## Supporting Figures

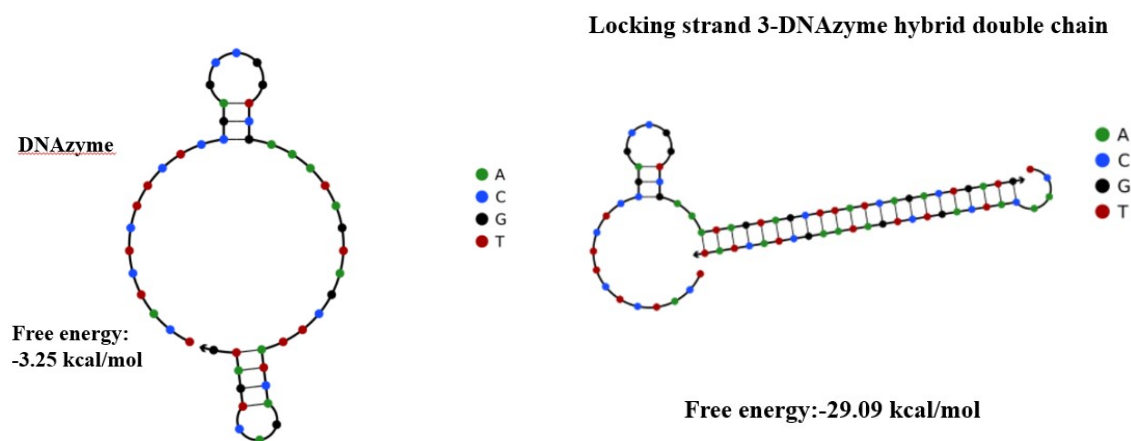

**Figure S1.** The lowest free energy structures of Probe A(left) and Probe A/Probe B Complex(right). As shown in the secondary structure, Probe B(Probe B-3) can be well integrated with the recognition region on one side of Probe A, and the target recognition site is retained at the convex end. They are predicted by NUPACK ([www.nupack.org](http://www.nupack.org)) at 37 °C .

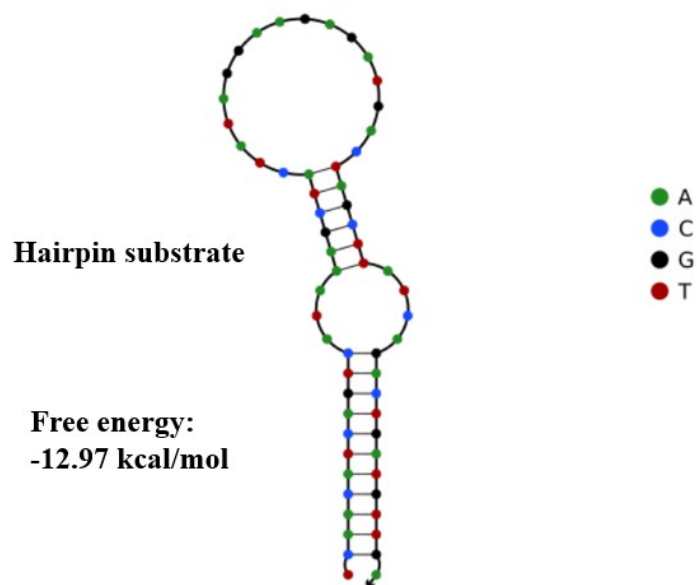

**Figure S2.** The lowest free energy structures of Probe C. It is predicted by NUPACK ([www.nupack.org](http://www.nupack.org)) at 37 °C.

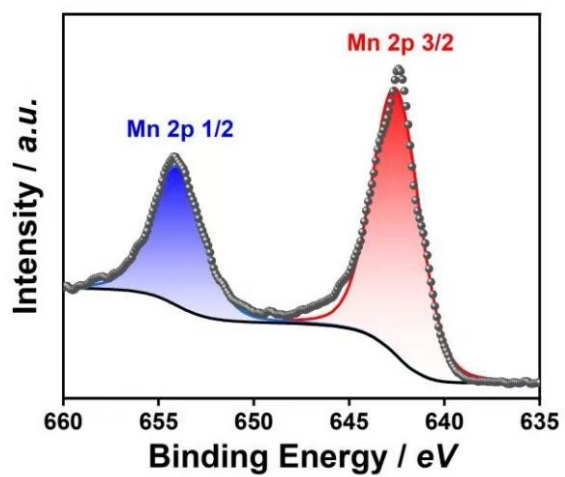

**Figure S3.** XPS spectra of Mn 2p of MnO<sub>2</sub> nanosheets.

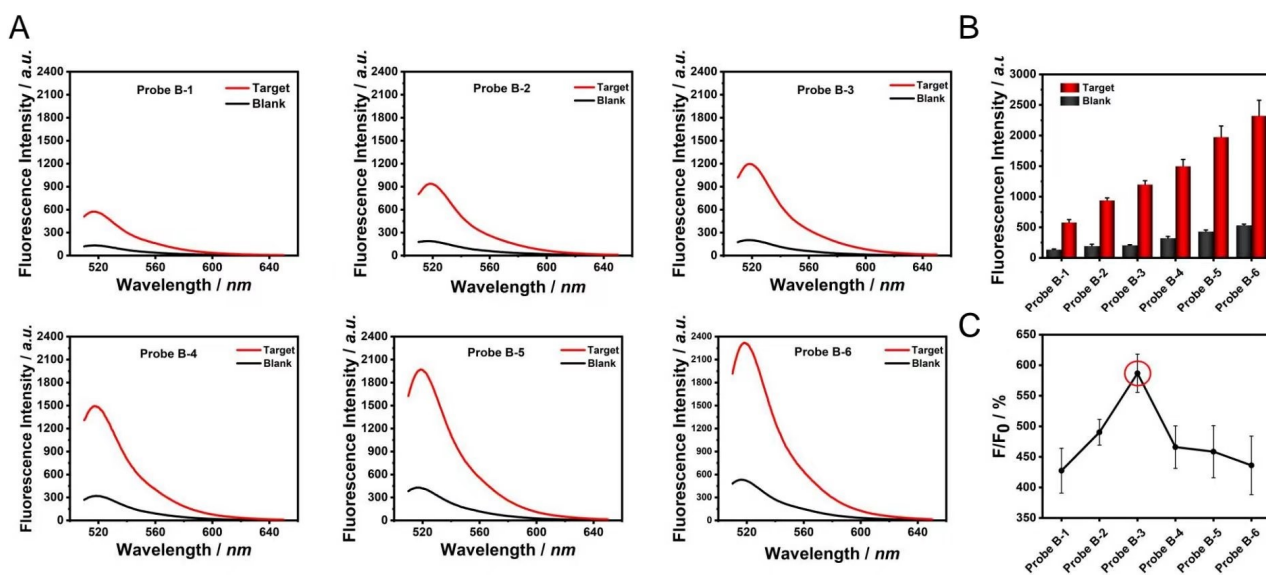

**Figure S4.** Probe B optimization experiment. (A) Fluorescence spectra of Probe A with Probe B of different lengths (Probe B-1 to Probe B-6) in the presence (red line) or absence (black line) of the 150 nM target initiator. (B) Peak fluorescence intensity and (C) signal-to-noise ratio of different Probe A in the presence (F) and absence (F<sub>0</sub>) of target initiator. Probe B-3 is used in subsequent experiments unless otherwise stated. Error bars represent mean  $\pm$ SD (n = 3).

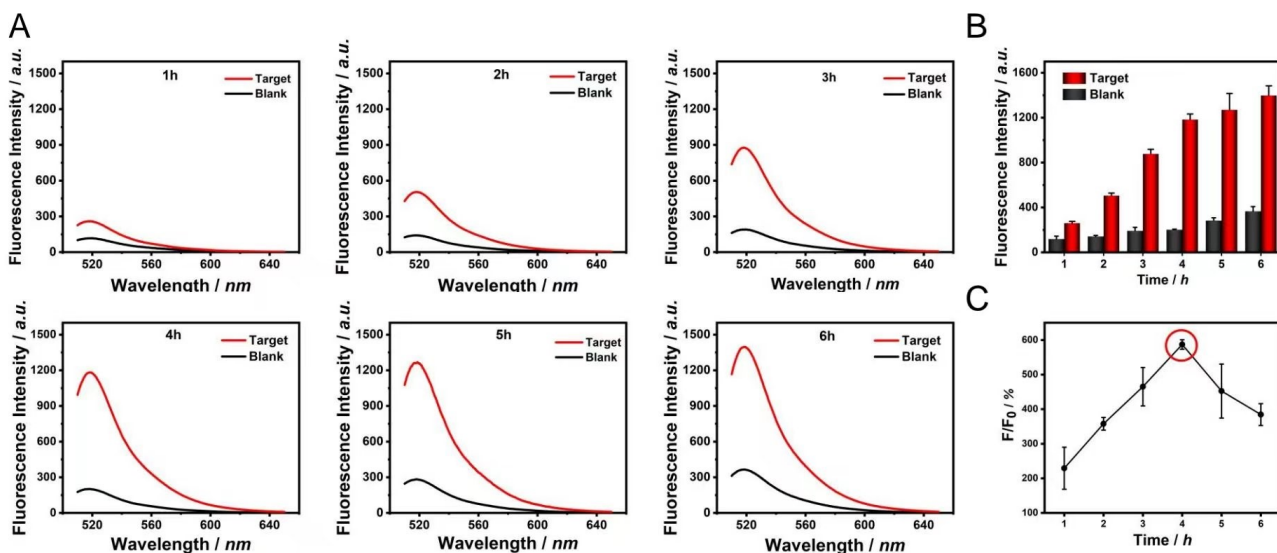

**Figure S5.** Optimization of the reaction time. (A) The fluorescence spectra of Probe A in the presence (red line) and absence (black line) of the target microRNA after 1 to 6 h incubation. (B) Peak fluorescence intensity and (C) signal-to-noise ratio of the samples in pane A. 4 h is used in subsequent experiments unless otherwise stated. Error bars represent mean  $\pm$ SD (n = 3).

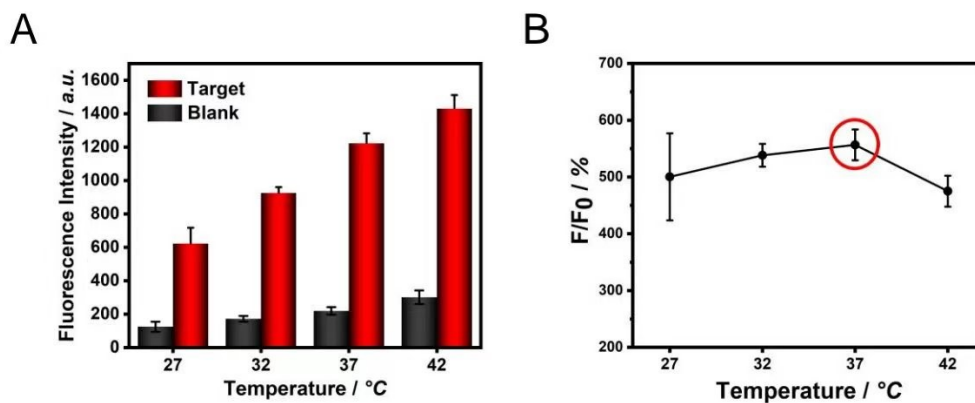

**Figure S6.** Optimization of the reaction temperature. 37°C is used in subsequent experiments unless otherwise stated. Error bars represent mean  $\pm$ SD (n = 3).

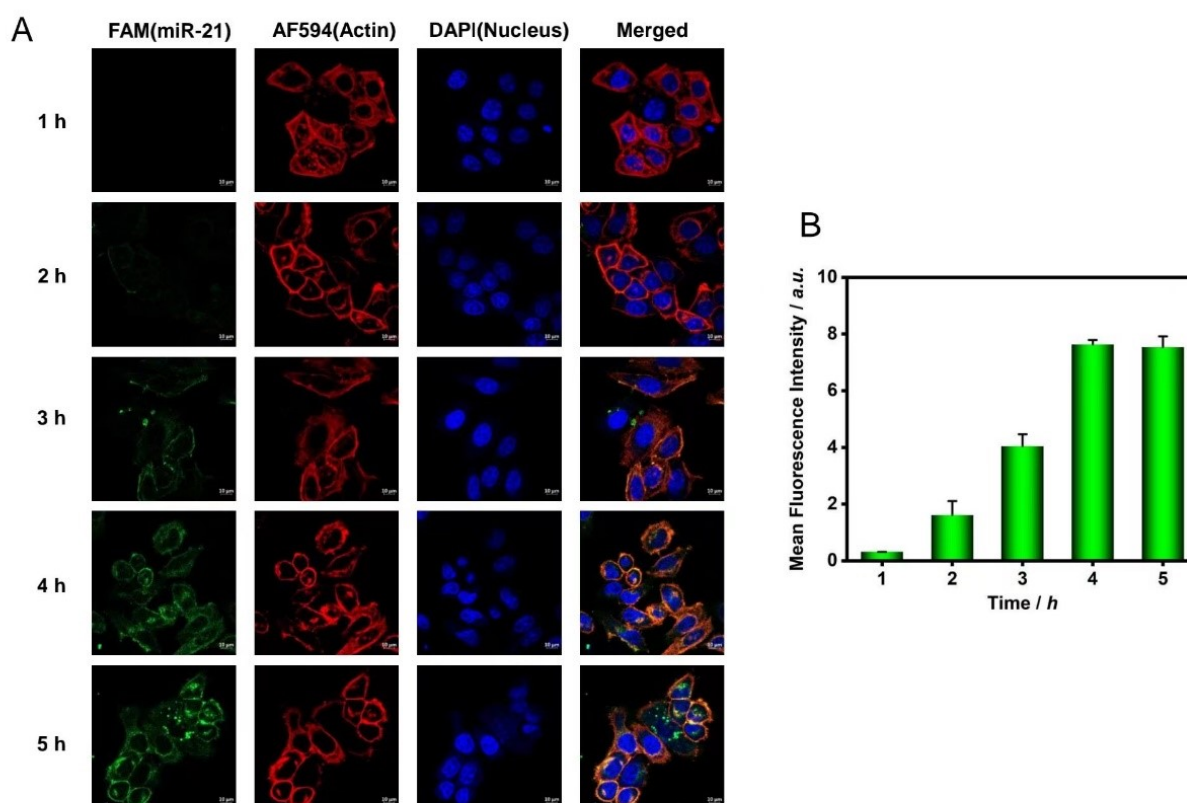

**Figure S7.** Time-dependent intracellular imaging by this proposed method. (A) Confocal fluorescence images of MCF-7 cells and (B) the mean fluorescence intensity of the corresponding cells detected by the FTO-switched nanoprobe with different incubation time. Error bars represent mean  $\pm$ SD (n = 3).



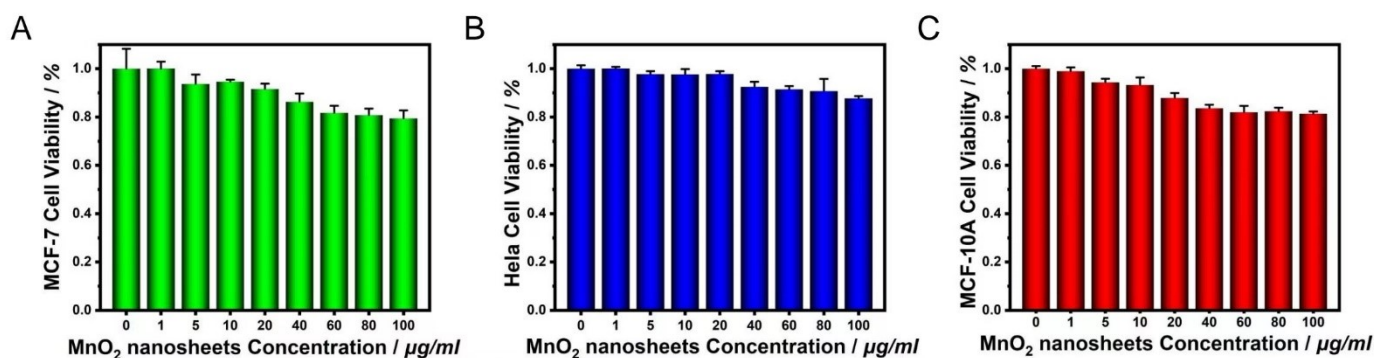

**Figure S8.** Cell proliferation assay for the investigation of cytotoxicity of MnO<sub>2</sub> nanosheets. The cell viability values (%) are determined by incubating (A) MCF-7 cells, (B) HeLa cells and (C) MCF-10A cells with MnO<sub>2</sub> nanosheets of varied concentrations (0-100 µg/mL) for 24 h. Error bars represent means ± SD (n = 3).

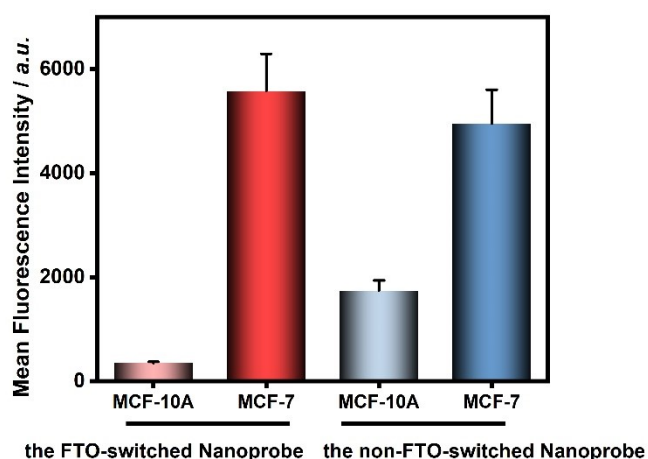

**Figure S9.** Comparison of the flow cytometric mean fluorescence intensity data in MCF-7 and MCF-10A cells using the FTO-switched nanoprobes and the non-FTO-switched nanoprobes. The data error bars indicate mean ± SD (n=3).

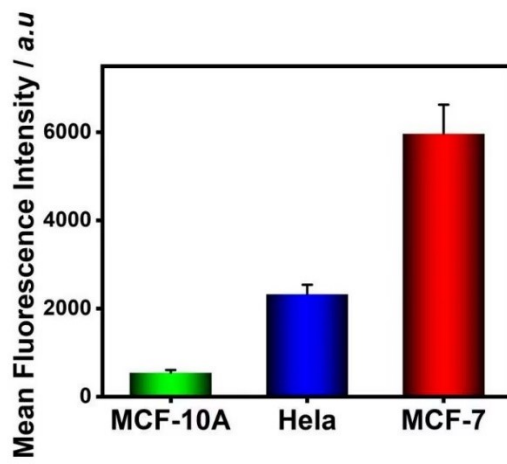

**Figure S10.** The flow cytometric mean fluorescence intensity data in MCF-7, HeLa and MCF-10A cells using the FTO-switched nanoprobe. The data error bars indicate mean  $\pm$  SD (n=3).

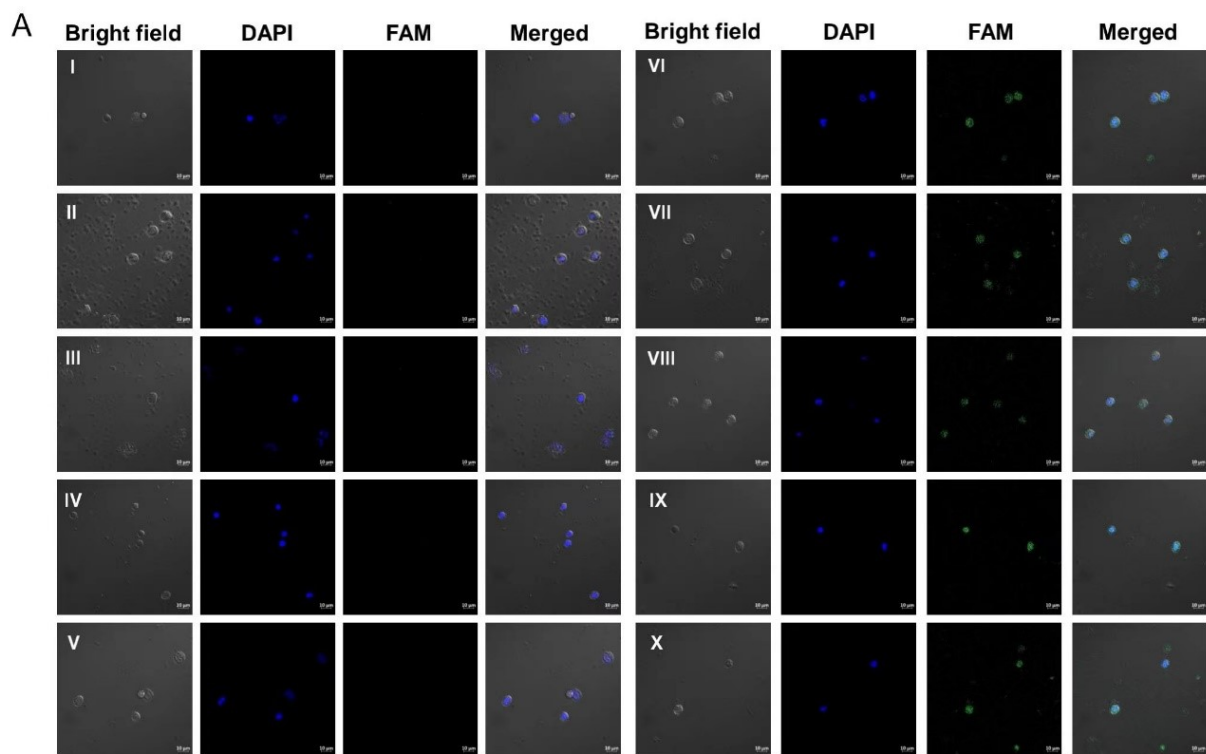

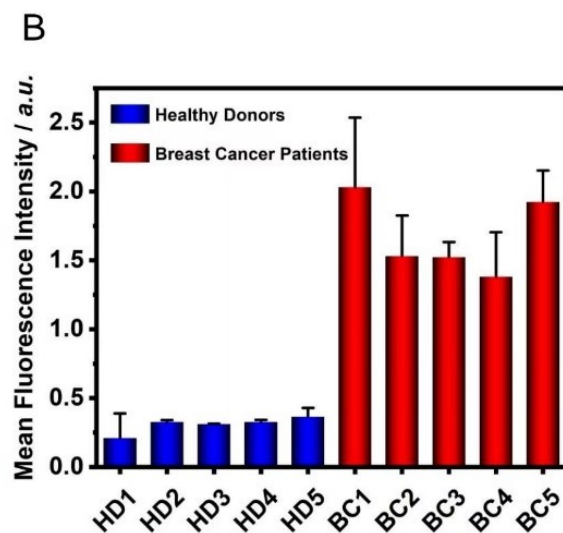

**Figure S11.** Application of the FTO-switched nanoprobe in the clinic. (A) Confocal fluorescence imaging of the samples from healthy individuals (I-V) and breast cancer patients (VI-X). The scale bar is 10  $\mu\text{m}$ . (B) The results of circulating tumor cells were detected by the FTO-switched nanoprobe in 10 samples.

## REFERENCE

1. M. Ye, Y. Kong, C. Zhang, Y. Lv, S. Cheng, D. Hou and Y. Xian, *ACS Nano*, 2021, **15**, 14253-14262.
2. Z. Z. Yang, B. R. Liu, T. Huang, B. P. Xie, W. J. Duan, M. M. Li, J. X. Chen, J. Chen and Z. Dai, *Analytical Chemistry*, 2022, **94**, 8014-8023.
3. X. Wang, G. Kim, J. L. Chu, T. Song, Z. Yang, W. Guo, X. Shao, M. L. Oelze, K. C. Li and Y. Lu, *J Am Chem Soc*, 2022, **144**, 5812-5819.
4. Y. Gao, S. Zhang, C. Wu, Q. Li, Z. Shen, Y. Lu and Z. S. Wu, *ACS Nano*, 2021, **15**, 19211-19224.
5. R. Wang, S. Wang, X. Xu, W. Jiang and N. Zhang, *Anal Chim Acta*, 2021, **1149**, 338213.
6. F. Yang, S. Li, X. Li, R. Yuan and Y. Xiang, *Analytical Chemistry*, 2022, **94**, 8014-8023.
7. J. Li, A. Wang, X. Yang, K. Wang and J. Huang, *Anal Chem*, 2021, **93**, 6270-6277.
8. J. L. Gao, Y. H. Liu, B. Zheng, J. X. Liu, W. K. Fang, D. Liu, X. M. Sun, H. W. Tang and C. Y. Li, *ACS Appl Mater Interfaces*, 2021, **13**, 31485-31494.
